# Supplementary material for: Modesty and Security: Attributes Associated With Comfort and Willingness to Engage in Telelactation
Source: Preprints.org preprint supplement (doi:10.20944/preprints202012.0290.v1), 2020-12-11
Supplement: Supplementary file 2 [file supplementary]

## File S2: You and Technology

### YOU AND TECHNOLOGY

During this part of the survey, we want to learn of your opinions, thoughts and feelings about technology.

Imagine the time about 1 month before you had this baby. What if someone told you about a program that could allow you to have questions answered once you returned home. The program would give you access to professional breastfeeding support **at home by using a videochat app on your smartphone.**

This program would allow you to:

- Get info and help **on-demand anywhere.**
- Videochat with the help center **anytime 24/7.**
- Connect with a **breastfeeding support professional** via videochat.
- Have a **hands-free** session by using a phone holder (see picture on the right below).

The kind of help available could be:

- **Education** if you had a question about feeding your baby.
- Help such as how to **get the baby to latch on.**
- **Other questions** you may have about breastfeeding.

The trained professional would see you as you videochat about your breastfeeding questions. She would give you **accurate info.**
