# Supplementary material for: Modesty and Security: Attributes Associated With Comfort and Willingness to Engage in Telelactation
Source: Preprints.org preprint supplement (doi:10.20944/preprints202012.0290.v1), 2020-12-11
Supplement: Supplementary file 3 [file supplementary]

Archive with 2 entries (2 files):
- File S1.pdf
- File S2.pdf
