# Supplementary figures and images for: Modesty and Security: Attributes Associated With Comfort and Willingness to Engage in Telelactation
Source: Preprints.org preprint supplement (doi:10.20944/preprints202012.0290.v1), 2020-12-11

## File S1: “What Do Moms Need” Study Protocol

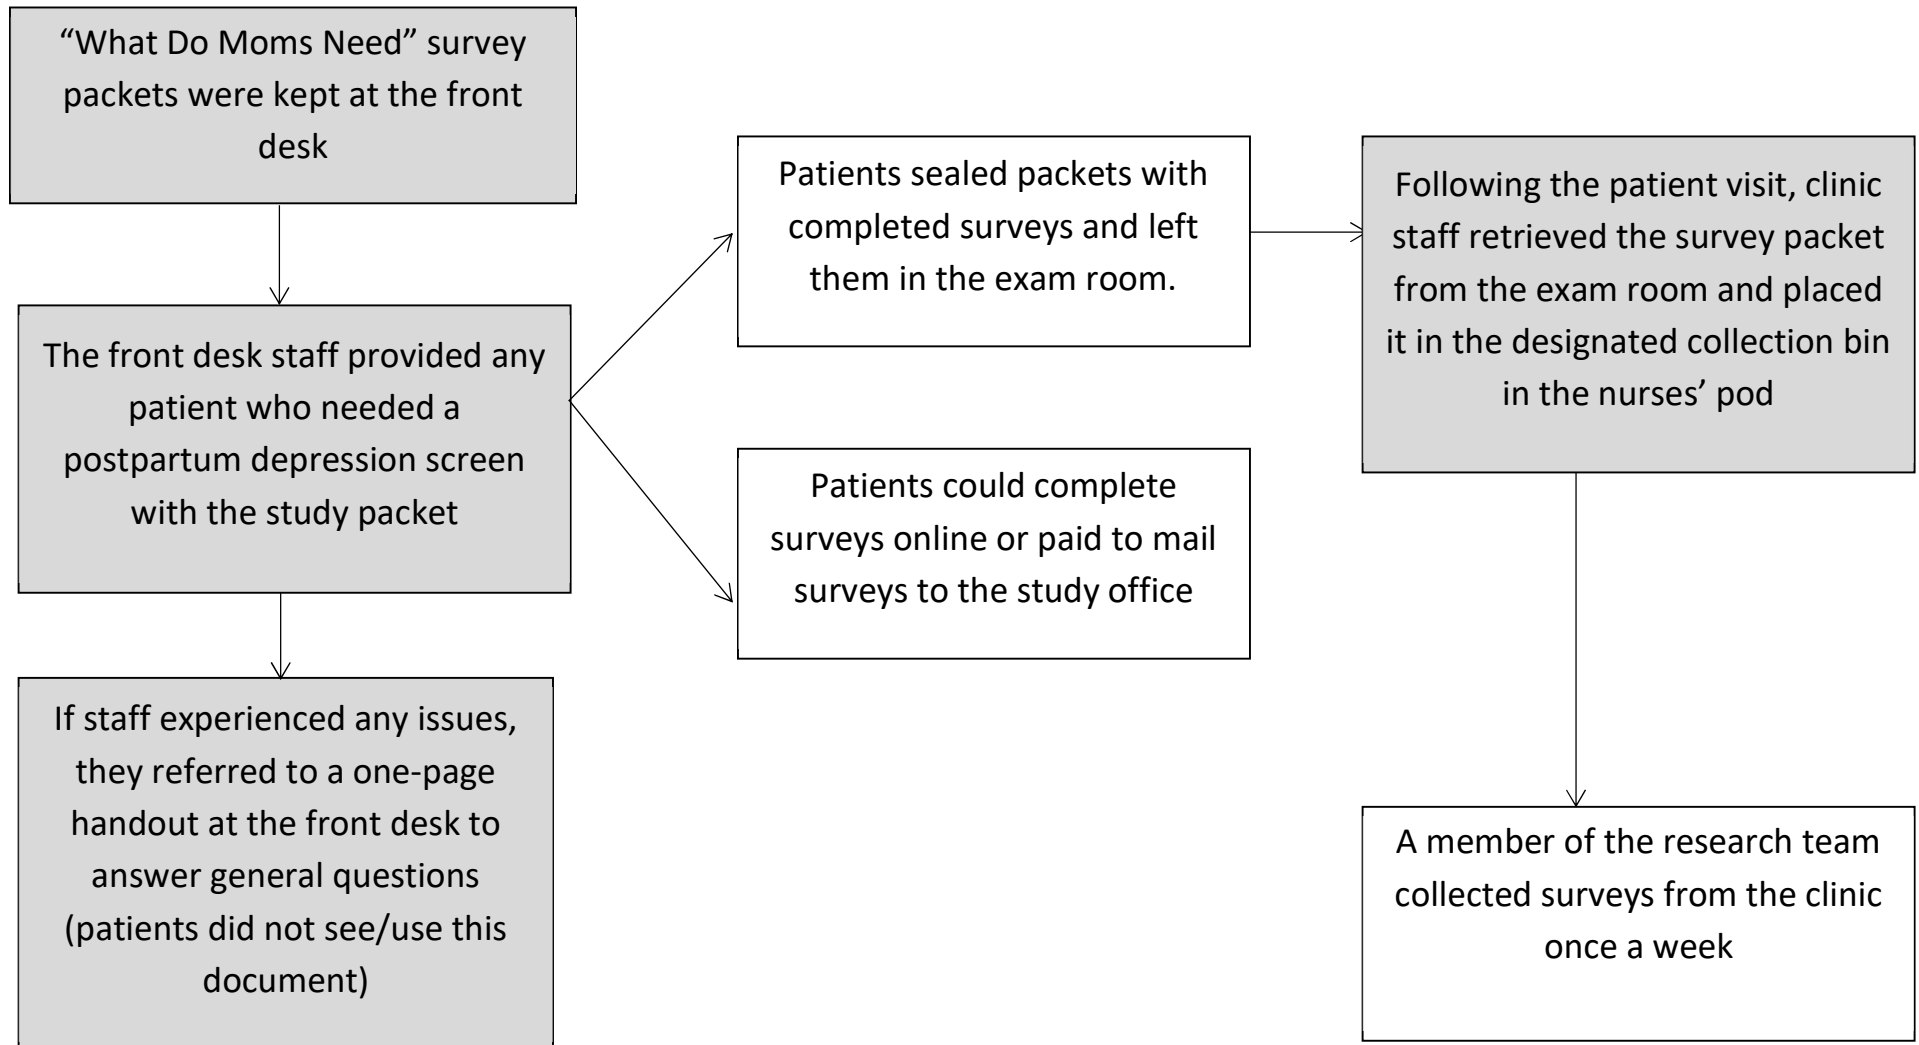

Supplement: Supplementary file 1 [file supplementary]
